# Supplementary material for: Phylogenetic placement of the enigmatic parasite, Polypodium hydriforme, within the Phylum Cnidaria
Source: PubMed Central journal article supplement (PMC2396633; doi:10.1186/1471-2148-8-139), 2008-05-09
Supplement: 1471-2148-8-139-S1.pdf [file 1471-2148-8-139-S1.pdf]

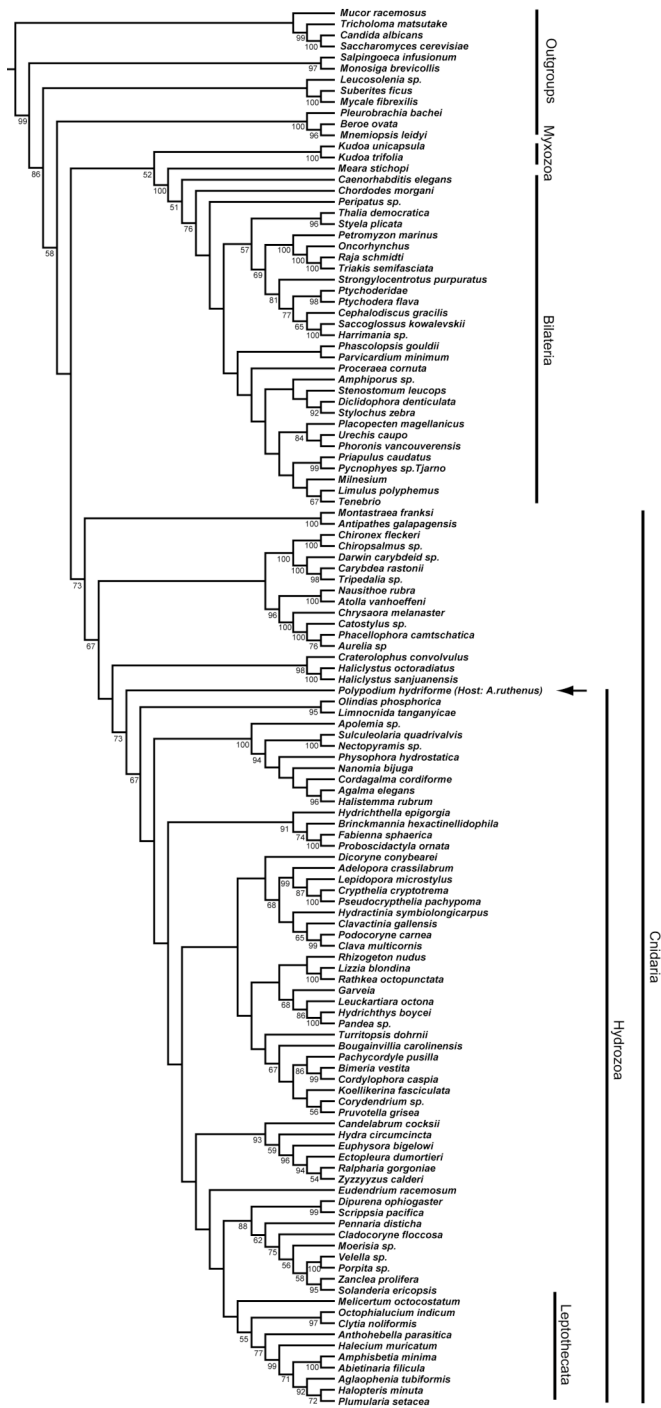

**Additional file 1.** ML topology of relationships among 126 metazoan taxa, based on a combined analysis of nearly complete 18s and partial 28s rDNA sequences. Arrow indicates *Polypodium* taxa. Bootstrap values greater than 50 are indicated. Corresponding phylogram and assumed model description are displayed in figure 2A.
