# Supplementary material for: Phylogenetic placement of the enigmatic parasite, Polypodium hydriforme, within the Phylum Cnidaria
Source: PubMed Central journal article supplement (PMC2396633; doi:10.1186/1471-2148-8-139), 2008-05-09
Supplement: 1471-2148-8-139-S8.pdf [file 1471-2148-8-139-S8.pdf]

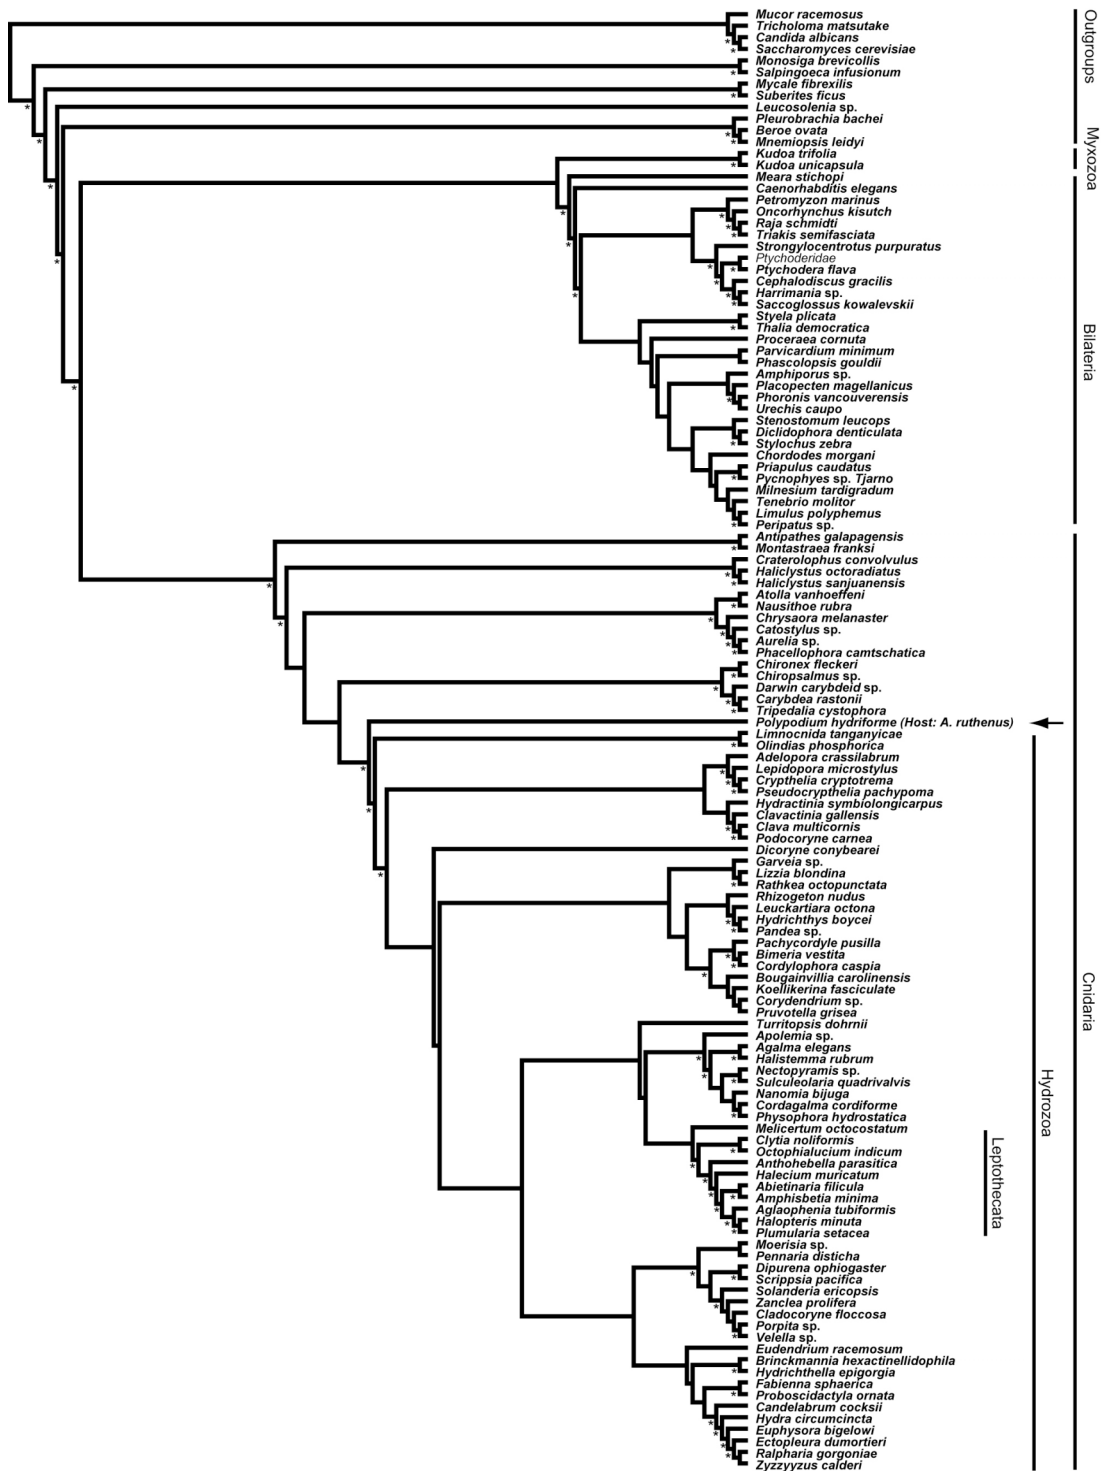

**Additional file 8** - ML topology of metazoan relationships of combined partial 28s rDNA and 18s rDNA sequences, excluding length-variable regions. The dataset was reduced to 2115 characters (from 4842), 1391 which are parsimony informative (from 2124). Bootstrap values greater than 50 are indicated by \*, where space permits. Arrow indicates *Polypodium* taxa. The assumed model (GTR+I + G) has six substitutions rates estimated from the
